# Supplementary material for: Food-insecure pregnant women in South Africa: a cross-sectional exploration of maternal depression as a mediator of violence and trauma risk factors
Source: PubMed Central journal article supplement (PMC6429723; doi:10.1136/bmjopen-2017-018277), 2019-03-13
Supplement: bmjopen-2017-018277supp001.pdf [file bmjopen-2017-018277supp001.pdf]

**Supplemental Table 1.** Sensitivity analysis: comparison of key sociodemographic variables between participants included in and excluded from the current study.

|                                        | <b>Included sample</b> | <b>Excluded sample</b> | <b>p-value</b> |
|----------------------------------------|------------------------|------------------------|----------------|
| Number of mothers                      | 992                    | 233                    |                |
| Clinic                                 |                        |                        |                |
| Mbekweni                               | 549 (55)               | 131 (56)               |                |
| TC Newman                              | 443 (45)               | 102 (44)               | 0.808          |
| Race                                   |                        |                        |                |
| Black                                  | 548 (55)               | 132 (57)               |                |
| Coloured                               | 443 (45)               | 101 (43)               | 0.708          |
| Maternal Income                        |                        |                        |                |
| <R1,000/month                          | 767 (77)               | 168 (78)               |                |
| R1000-R5000/month                      | 212 (21)               | 44 (20)                | 0.954          |
| R5000-R10,000/month                    | 12 (1)                 | 3 (1)                  |                |
| Receive social assistance              | 491 (49)               | 92 (40)                | 0.005          |
| Maternal education                     |                        |                        |                |
| Some secondary                         | 613 (62)               | 127 (55)               |                |
| Completed Secondary                    | 379 (38)               | 103 (45)               | 0.066          |
| Median number of children in household | 1                      | 1                      | 0.911          |
| Married/cohabiting                     | 399 (40)               | 92 (40)                | 0.828          |
| Employed                               | 254 (26)               | 67 (29)                | 0.429          |
